# Supplementary material
Source: HighWire-hosted journal article supplement (https://bmjopen.bmj.com/content/6/9/e012027)
Supplement: inline-supplementary-material-6 [file inline-supplementary-material-6.pdf]

**Additional File 6:** List of the ATTEND Trial sites and their ethics committees. All sites have provided ethics approval for the process evaluation as per the current approved ATTEND trial protocol version 1.3, dated 9 December 2013. In addition, these \*five sampled sites have provided approval for patients and carers to be interviewed.

- 1) Christian Medical College and Hospital Ludhiana, Punjab, Institutional Ethics Committee
- 2) \*All India Institute for Medical Sciences and Technology, New Delhi, Institute Ethics Committee
- 3) \*Sree Chitra Tirunal Institute for Medical Sciences and Technology, Trivandrum, Kerala Institutional Ethics Committee
- 4) Super Specialty Hospital Guntur, Andhra Pradesh, Lalitha Super Specialities Hospital Ethics Committee
- 5) \*Christian Medical College Vellore, Tamil Nadu, Office of Research Institutional Review Board
- 6) Apollo Gleneagles, Kolkata, Institutional Ethics Committee
- 7) \*Baptist Christian Hospital, Tezpur, Assam Research Ethics Committee
- 8) Nizam Institute for Medical Sciences, Hyderabad, Nizam's Institute of Medical Sciences Institutional Ethics Committee
- 9) \*Postgraduate Institute for Medical Sciences and Research, Chandigarh Institute Ethics Committee
- 10) Neurological Research Centre Hospitals, Assam, Institute of Neurological Sciences Trust Ethics Committee
- 11) Global Hospitals, Chennai, Institutional Ethics Committee
- 12) BGS Global Hospital, Bangalore, Institutional Ethics Committee
- 13) Amrita Institute of Medical Sciences, Kochi, Institutional Ethics Committee
- 14) St Stephen's Hospital, New Delhi. Ethics Committee of St. Stephen's Hospital
